# Supplementary material for: A general approach for stabilizing nanobodies for intracellular expression
Source: eLife. 2022 Nov 23;11:e68253. doi: 10.7554/eLife.68253 (PMC9683787; doi:10.7554/eLife.68253)
Supplement: Supplementary file 2. [file elife-68253-supp2.xlsx]

## Sheet: Nanobody Framework Sequences
Unstable	Framework Sequences
1G6V	MAQVQLVESGGGSVQAGGSLRLSCAASMGWFRQAPGKEREGVATTYYGDSVKGRFTISQDNAKNTVYLQMNSLKPEDTAIYYCYRGQGTQVTVS
1JTP	MADVQLQASGGGSVQAGGSLRLSCAASMGWFRQAPGKEREGVAATYYADSVKGRFTISQDNAKNTVYLLMNSLEPEDTAIYYCSWGQGTQVTVS
1KXQ	MAQVQLVESGGGSVQAGGSLSLSCAASVGWFRQAPGKEREGVAATYSADSVKGRFTLSQDNNKNTVYLQMNSLKPEDTGIYYCYWGQGTQVTVS
1KXT	MAQVQLVASGGGSVQAGGSLRLSCAASMGWYRQAPGKECELSARANYADSVKGRFTISRDNAANTAYLQMDSLKPEDTAVYYCYWGQGTQVTVS
1KXV	MAQVQLVESGGGTVPAGGSLRLSCAASMSWYRRAPGKGRDFVSGTTYVDSVAGRFTISQGNAKNTAYLQMDSLKPDDTAMYYCPWGQGTQVTVS
1RJC	MAEVQLQASGGGSVQAGQSLRLSCATSMGWFRQAPGKEREGVAVTAYADSVQGRLTISLDNAKNTLYLQMNSLKPEDTAMYYCYWGQGTQVTVS
1ZV5	MADVQLVESGGGSVQAGESLRLSCAASIGWFRQAPGKDREGVVFTYYADSVKGRFTISQDNAKNTVYLQMNSLKPEDTASYYCYWGQGTQVTVS
2P42	MAQVQLVESGGGLVQAGGSLRLSCAASMGWFRQAPGKEREGVAATLYADSVKGRFTISRDKGKNTVYLQMDSLKPEDTATYYCQWGQGTQVTVS
2X6M	MAQGQLVESGGGSVQAGGSLRLSCAASMGWFRQRPGKEREGVARTAYADSVKDRFTISRDNAENTVYLQMNSLKPEDTAIYYCYWGQGTQVTVS
3CFI	MAQVQLQESGGGLVQPGGSLRLSCAASMSWVRQAPGKGLEWVSGTSYTAPVKGRFTISRDNAKNILYLQMNSLRPEDTAVYYCDRGQGTQVTVS
3G9A	MADVQLQESGGGSVQAGGSLRLSCAASMAWFRQAPGKECELVSNTTYAGSVKGRFTISRDDAKNTVYLQMVNLKSEDTARYYCYWGKGTQVTVS
3J6A	MAQVQLQESGGGSVQTGGSLRLSCAASMGWFRQAPGKEREGVAGAYYADSVKGRFTISQDKAKNTVYLQMNSLKPEDTAIYYCAWGQGTQVTVS
3K1K	MAQVQLVESGGALVQPGGSLRLSCAASMRWYRQAPGKEREWVAGSSYEDSVKGRFTISRDDARNTVYLQMNSLKPEDTAVYYCYWGQGTQVTVS
3K74	MAQVQLQESGGGLVQPGGSLRLSCAASMYWVRRAPGKGLEWVSMTKYAESVKGRFTISRDNAKNTLYLQMNSLTSEDTAVYYCKKGQGTQVTVS
3K7U	MAQVQLQESGGGLVQAGGSLTLSCAASMGWFRQAPGKEREFVAALFYADSVNGRFTISRDNAKRTVTLQMNSLKPEDTAVYYCYWGQGTQVTVS
3V0A	MAQVQLVESGGGLVQPGGSLRLSCAASMSWVRQAPGEGFEWVSSAWDGDSAKGRFTTSRDDAKNTLYLQMSNLQPEDTGVYYCSWGQGTQVTVS
3ZKQ	MAQVQLQESGGGLVQPGGSLRLSCAASMTWVRQAPGKGREWVSTTTYADSVKGRFTISRDNARNTLYLQMNSLKPEDTAVYYCRRGPGTQVTVS
4C58	MAQVQLQESGGGSVQAGGSLRLSCGASMGWFRQAPGAEREGVACSYYSDSVRGRFTISQDNAKTTAFLLMSSLKPEDTAIYYCTAGQGTQVTVS
4GRF	MAEVQLVESGGGLVQPGGSLRLSCAASIGWFRQAPGKEREGVSCTYYADSVKGRFTISRDNAESTVYLQMNSLKPEDTAVYYCYWGQGTQVTVS
4HEM	MAQVQLVESGGGLVQAGGSLRLSCAASMGWFRQAPGPEREFVATTYYRNSVKGRFTISRDNAKNTVYLQMNNMKPEDTAVYYCYWGQGTQVTVS
4HEP	MADVQLVESGGGLVQPGGSLRLSCEASIGWFRQAPGKEREGVSYTYVADSVTGRFTISSDNAKNTVYLQMNSLKLEDTAVYYCYWGKGTLVTVS
4I0C	MAQVQLQESGGGSVQAGGSLRLSCEASMAWFRQAPGKEREGVAAPYYADSVKGRFTISQDNAKNRMYLQMNSLEPEDTAMYYCHWGQGTQVTVS
4I13	MAQVQLQESGGGLVQAGASLRLSCAASIGWFRQAPGKEREFVAATVYGESVEGRFTISRDIAKNTMNLQMNVLRPEDTANYYCLWGRGTQVTVS
4KML	MAQVQLQESGGGLVQPGGSLRLSCAASMGWFRQAPGKGREFVASSDYTDSVKGRFTISRDNAKNTMYLQMNNLKPEDTATYYCHWGQGTQVTVS
4KRM	MAQVKLEESGGGSVQTGGSLRLTCAASMGWFRQAPGKEREFVSGTGYADSVKGRFTISRDNAKNTVDLQMNSLKPEDTAIYYCYWGQGTQVTVS
4LAJ	MAQVQLVESGGGLVQPGGSLRLSCAASIGWFRQAPGKEREGVSCTYYADSVKGRFTISRDNAKNTVYLQMNSLKPEDTAVYYCYYGKGTQVTVS
4LGP	MAQVQLVETGGGLVQPGGSLTLSCAGSIGWFRQAPGKEHEWLVCTVYVDSVKGRFTASRDNAKNTVYLQLNSLKPDDTGIYYCPWGQGTQVTVS
4LGS	MAQVQLVESGGGLVQAGGSLSLSCAASMAWFRQAPGKEREFVASTYYLDSVKGRFTISRDNAKNALYLQMNNLKPEDTAVYYCYWGQGTQVTVS
4LHJ	MAQVQLVESGGGLVQAGGSLRLSCAASMGWYRQAPGKERELVATSNYADSVKGRFTISGDNAKNTVSLQMNSLKPEDTAVYYCHWGQGTQVTVS
4MQS	MAQVQLQESGGGLVQAGDSLRLSCAASIGWFRQAPGQEREGVSCTIYADSAKGRFTISSDNAENTVYLQMNSLKPEDTAVYVCYWGQGTQVTVS
4OCL	MAQVQLQESGGGLVPAGGSLRLSCVDSMAWFRQAPGKEREFVATTYYADSVKGRFTISRDNARNTVYLQMNSLKPEDTAVYYCFWGRGTQVTVS
4QGY	MAQVQLVESGGGLVQAGGSLRLSCAASIGWFRQAPGKEREGVSCTYYPDSVKGRFTASSDKAKNMVYLQMNSLKPEDTAVYYCYWGKGTQVTVS
4QKX	MAQVQLQESGGGLVQAGGSLRLSCAASMGWYRQAPGKQRELVAATNYANSVKGRFTISRDNAANTVYLQMNSLKPEDTAVYYCYWGQGTQVTVS
4S10	MAQVQLQESGGGLVQAGGSLRLSCAASMGWFRQAPGKEREFVASTRYADSAKGRFTISKDNAKNTVSLQMDNLNPDDTAVYYCTWGQGTQVTVS
4W6W	MAQVQLQESGGGSVQAGGSLRLSCAASMGWFRQAPGKEREGVACVNYADSVKGRFTISQDSAKKTLYLEMNSLKPEDTALYSCYWGQGTQVTVS
4W6X	MAQVQLQESGGGSVQAGGSLRLSCTASMGWFRQAPGKEREGVACSYYADSVKGRFTISQDNAKDTVFLRMNSLKPEDTAIYYCDWGQGTQVTVS
4W6Y	MAQVQLQESGGGSVQAGGSLRLSCAASMAWFRQVPGKEREGVASTYYADSVKGRFTISRDNAKNTVSLQMNSLKPEDTATYYCYWGQGTQVTVS
4WEM	MAQVQLQESGGGLVQAGGSLRLSCEASMGWFRQAPGKQREFVGYLNYGDFVKGRFTISRDNAKNTVYLQMSNLKSEDTGVYFCHWGKGTQVTVS
4WEN	MAQVQLQESGGGLVQPGGSLRLSCTASMGWYRQAPGSKREFVAHTEFADSVKGRFTISRDNAKTTVDLQMNSLKPEDTAVYYCHWGKGTQVTVS
4WEU	MAQVQLQESGGGLVQAGGSLRLSCAASMGWFRQAPGKKREYVAATYYADIAKGRFTISRDNAKNTLYLQMDSLKPEDTAVYYCYWGQGTQVTVS
4X7C	MADVQLVESGGGLVQPGGSLRLSCAASMGWYRQAPGKQRELVASTNYADSVKGRFTISGDNAKNTVYLQMNSLKPEDTAVYYCGRGRGTQVTVS
5IV0	MAQVQLVESGGGLVQPGGSLTLSCTASIGWFRQAPGKEREGVSCTYYADSVKGRFTIFMNNAKDTVYLQMNSLKPEDTAIYYCFWGQGTQVTVS
Stable
1OP9	MAQVQLQESGGGSVQAGGSLRLSCSASSGWFRQAPGKEREGVAATYYADSVKGRFTISQDNAKNTVYLQMNSLKPEDTAMYYCYWGQGTEVTVS
1ZVH	MADVQLVESGGGSVQAGGSLRLSCAASLGWFRQAPGKEREGVAAPYYADSVKGRFTVSLDNAENTVYLQMNSLKPEDTALYYCYWGQGTQVTVS
1ZVY	MADVQLVESGGGSVQAGGSLRLSCAASMTWFRQAPGKAREGVAATYYTDSVKGRFTISQDKAKNMAYLRMDSVKSEDTAIYTCYWGQGTQVTVS
2BSE	MAQVQLQESGGGLVQAGGSLRLSCTASMGWFRQLAGKEPELVVATYYADSVKGRFTVSRDSGKNTVYLQMNSLKPEDTAIYYCGWGQGTQVTVS
2XT1	MAQVQLVESGGGLVQAGGSLRLSCAASMAWYRQAPGKARELIAATVYDDSVKGRFTITRDDDKNILYLQMNDLKPEDTAMYYCSWGQGTQVTVS
3EBA	MAQVQLVESGGGSVQAGGSLRLSCSASSGWFRQAPGKGLEWVAATYYADSVKGRFTISQDNAKNTVYLQMNSLKPEDTAMYYCYWGQGTQVTVS
3P0G	MAQVQLQESGGGLVQAGGSLRLSCAASMGWYRQAPGKQRELVAATNYANSVKGRFTISRDNAANTVYLQMNSLKPEDTAVYYCYWGQGTQVTVS
3RJQ	MAQVQLQESGGGLVQAGGSLRLSCTASMGWFRQAPGKEREFVAATDYADSVKGRFAISKDNAKNAVYLQMNSLKPEDTAVYYCDWGQGTQVTVS
4AQ1	MAQVQLQESGGGLVQAGGSLRLSCAASMGWFRQAPGKEREFVAGTYYGASMKGRFTISRDNAKNTVYLQMNGLAPEDTAVYYCYWGQGTQVTVS
4C57	MAQVQLQESGGGLVQPGGSLRLSCSASMSWVRRVPGKGLEWVAGAHYRDSVKGRFTISRDNAKNMLYLQMSSLKSDDTGLYYCPSSQGTQVTVS
4CDG	MAQVQLQESGGGLVQAGGSLRLSCAASMAWYRQTPGKQRERIAITNYVDSVKGRFTISRDDAKNTMYLQMNSLIPEDTAVYYCFWGRGTQVTVS
4DK3	MAQVQLQESGGGLVQAGGSLRLSCAASMGWFRQAPGKEREFVAATYYTDSVKGRFTISRDNAKNTVELQMNSLKPEDTAVYYCYWGQGTQVTVS
4EIG	MAQVQLQESGGGLVQAGGSLRLSCKASMTWYRQAPGKERELVALTMTVDSVKGRFTISRDNVQNTVYLEMNNLKPEDTAVYYCYWGQGTQVTVS
4EIZ	MAQVQLQESGGGLVQAGGSLRLSCTASMGWFRQTPGKEREFVAATLYADSVKGRFTMSRDNAKNTVYLQMNSLKPEDTAVYYCSWGQGTQVTVS
4FHB	MAQVQLQESGGGLVQAGGSLRLSCEASMGWFRQAPGKERDFVAVTYYADSAKGRFTISRDNAKNTVYLQMNSLKPEDTAIYYCYWGQGTQVTVS
4GFT	MAQVQLQESGGGTVQPGGSLKLSCSAAMGWFRQAPGQEREFVAGQYYADSVKGRFTISRDNAMNAVYLQMNSVKAEDTAVYYCYWGQGTQVTVS
4GRE	MAEVQLVESGGGLVQPGGSLRLSCAASIAWFRQAPGKEREGVSGAYYADSVKGRFTISSDNAKNTVYLQMNSLRPEDTAVYYCYWGKGTLVTVS
4GRH	MAEVQLVESGGGLVQAGGSLRLSCAASVGWFRQAPGKEREFVAAPYYADSVKDRFTISRDNAKNTVYLQMNSLRPEDTAVYLCTWGQGTQVTVS
4IOS	MAQVQLVESGGGLVQAGDSLRLSCAVSIGWFRQAPGKEREFVAATYYGRSMKGRCAASRDNAKNTVALQLNSLKPEDTAVYYCYWGQGTQVTVS
4KRO	MAQVQLQESGGGLVQPGGSLRLSCAASMGWFRQAPGKQREFVAATYYTDSVKGRFTISRDNAKTTVYLQMNSLKPEDTAVYYCYWGQGTQVTVS
4LGR	MAQVQLVESGGGLVQPGGSLRLHCAASTCWYRQGTGKQRELVAATYYADSVKGRFTISRDNAKNTIDLQMNSLKPEDTAVYYCYWGQGTQVTVS
4LHQ	MAQVQLVETGGGTVQTGGSLRLSCSASMGWFRQAPGKEREFVAATYYRDSVKGRFTVSRDNAKNTVYLHLNSLKLEDTAAYYCYWGQGTQVTVS
4M3K	MAQVQLQESGGGLVQPGGSLRLSCAASMGWYRQDPGKGRELVALTTYAGSVKGRFTISRDNAKNTVYLEMSSLKPEDTAVYYCFWGQGTQVTVS
4N1H	MAQVQLQESGGGLVQAGASLKLSCAASMGWFRQAPGKEREFVAATKYADSVKGRFAISRDNDKNTVWLRMNSLKPEDTAVYYCDWGQGTQVTVS
4NBX	MAQVQLVESGGGLAQAGGSLRLSCAASMAWFRQPPGKEREFVAATYYADSVKGRFTISRDNAKNTVYLQMNSLKPEDTAVYYCYWGQGTQVTVS
4NBZ	MAQVKLEESGGGLVQAGGSLRLSCAASVAWFRQAPGAEREFVAVTYYADSVKGRFTISRDNAKVTVYLQMNNLKREDTAVYFCYWGQGTQVTVS
4NC2	MAQVQLVESGGGLVQAGGSLRLSCAASMGWFRQAPGKEREFVAAPNYADSVKGRFTISRDNSKNTQYLQMNSLKPEDTAVYYCYWGQGTQVTVS
4ORZ	MAQVQLQESGGGLVQAGGSLRLSCAASMGWYRQAPGKQRELVAFTDYPDSVKGRFTISRDNVKNTVYLQMNSLKPEDTAVYYCLWSQGTQVTVS
4P2C	MAQVQLQESGGGLVQAGGSLRLSCAVSMGWYRQAPGKQREFVASTNYRDSVKGRFTISRDNAKNTVYLQMNSLKPEDTAVYYCYWGQGTQVTVS
4QO1	MAQVQLQESGGGLVQAGGSLRLSCAASMGWFRQAPGREREFLAQTYYAESVKDRTTISRDNAKNTVYLEMNNLNADDTGIYFCYWGQGTQVTVS
4TVS	MAQVQLVESGGGLVQAGGSLRLSCAASVGWFRQAPGLEREFVATTHYADSVKGRFTISRDNAKNTVYLQMNSLKPEDTAVYYCYWGQGTQVTVS
4WGV	MAQVQLQESGGGLVQAGGSLRLSCAASANWYRQPPGMQRELVATANYADSVKGRFTISRDRARNTVYLQMNSLKPEDTGVYYCYWGQGTQVTVS
4X7F	MADVQLVESGGGLVQPGGSLRLSCAASMAWYRQGPGEQRELVAVTDYADSVKGRFTISRDNAKNMVYLLMSNLRPEDTAVYYCPWGQGTQVTVS

## Sheet: Full Sequences
PDB		Full Sequences
1G6V	MAQVQLVESGGGSVQAGGSLRLSCAASGYTVSTYCMGWFRQAPGKEREGVATILGGSTYYGDSVKGRFTISQDNAKNTVYLQMNSLKPEDTAIYYCAGSTVASTGWCSRLRPYDYHYRGQGTQVTVS
1JTP	MADVQLQASGGGSVQAGGSLRLSCAASGYTIGPYCMGWFRQAPGKEREGVAAINMGGGITYYADSVKGRFTISQDNAKNTVYLLMNSLEPEDTAIYYCAADSTIYASYYECGHGLSTGGYGYDSWGQGTQVTVS
1KXQ	MAQVQLVESGGGSVQAGGSLSLSCAASTYTDTVGWFRQAPGKEREGVAAIYRRTGYTYSADSVKGRFTLSQDNNKNTVYLQMNSLKPEDTGIYYCATGNSVRLASWEGYFYWGQGTQVTVS
1KXT	MAQVQLVASGGGSVQAGGSLRLSCAASGYTFSSYPMGWYRQAPGKECELSARIFSDGSANYADSVKGRFTISRDNAANTAYLQMDSLKPEDTAVYYCAAGPGSGKLVVAGRTCYGPNYWGQGTQVTVS
1KXV	MAQVQLVESGGGTVPAGGSLRLSCAASGNTLCTYDMSWYRRAPGKGRDFVSGIDNDGTTTYVDSVAGRFTISQGNAKNTAYLQMDSLKPDDTAMYYCKPSLRYGLPGCPIIPWGQGTQVTVS
1OP9	MAQVQLQESGGGSVQAGGSLRLSCSASGYTYISGWFRQAPGKEREGVAAIRSSDGTTYYADSVKGRFTISQDNAKNTVYLQMNSLKPEDTAMYYCAATEVAGWPLDIGIYDYWGQGTEVTVS
1RJC	MAQVQLQASGGGSVQAGQSLRLSCATSGATSSSNCMGWFRQAPGKEREGVAVIDTGRGNTAYADSVQGRLTISLDNAKNTLYLQMNSLKPEDTAMYYCAADTSTWYRGYCGTNPNYFSYWGQGTQVTVS
1ZV5	MADVQLVESGGGSVQAGESLRLSCAASGVTYKNYCIGWFRQAPGKDREGVVFINSDGGITYYADSVKGRFTISQDNAKNTVYLQMNSLKPEDTASYYCAAGYRNYGQCATRYWGQGTQVTVS
1ZVH	MADVQLVESGGGSVQAGGSLRLSCAASGYIASINYLGWFRQAPGKEREGVAAVSPAGGTPYYADSVKGRFTVSLDNAENTVYLQMNSLKPEDTALYYCAAARQGWYIPLNSYGYNYWGQGTQVTVS
1ZVY	MADVQLVESGGGSVQAGGSLRLSCAASGSTDSIEYMTWFRQAPGKAREGVAALYTHTGNTYYTDSVKGRFTISQDKAKNMAYLRMDSVKSEDTAIYTCGATRKYVPVRFALDQSSYDYWGQGTQVTVS
2BSE	MAQVQLQESGGGLVQAGGSLRLSCTASRRTGSNWCMGWFRQLAGKEPELVVALNFDYDMTYYADSVKGRFTVSRDSGKNTVYLQMNSLKPEDTAIYYCAARSGGFSSNRELYDGWGQGTQVTVS
2P42	MAQVQLVESGGGLVQAGGSLRLSCAASGYAYTYIYMGWFRQAPGKEREGVAAMDSGGGGTLYADSVKGRFTISRDKGKNTVYLQMDSLKPEDTATYYCAAGGYELRDRTYGQWGQGTQVTVS
2X6M	MAQGQLVESGGGSVQAGGSLRLSCAASGIDSSSYCMGWFRQRPGKEREGVARINGLGGVKTAYADSVKDRFTISRDNAENTVYLQMNSLKPEDTAIYYCAAKFSPGYCGGSWSNFGYWGQGTQVTVS
2XT1	MAQVQLVESGGGLVQAGGSLRLSCAASGSFFMSNVMAWYRQAPGKARELIAAIRGGDMSTVYDDSVKGRFTITRDDDKNILYLQMNDLKPEDTAMYYCKASGSSWGQGTQVTVS
3CFI	MAQVQLQESGGGLVQPGGSLRLSCAASGFAFSGYAMSWVRQAPGKGLEWVSGINRDGSTSYTAPVKGRFTISRDNAKNILYLQMNSLRPEDTAVYYCAKWLGGRDWYDRGQGTQVTVS
3EBA	MAQVQLVESGGGSVQAGGSLRLSCSASGYTYISGWFRQAPGKGLEWVAAIRSSDGTTYYADSVKGRFTISQDNAKNTVYLQMNSLKPEDTAMYYCAATEVAGWPLDIGIYDYWGQGTQVTVS
3G9A	MAQVQLQESGGGSVQAGGSLRLSCAASGDTFSSYSMAWFRQAPGKECELVSNILRDGTTTYAGSVKGRFTISRDDAKNTVYLQMVNLKSEDTARYYCAADSGTQLGYVGAVGLSCLDYVMDYWGKGTQVTVS
3J6A	MAQVQLQESGGGSVQTGGSLRLSCAASEYTQSSACMGWFRQAPGKEREGVAGISRFFGTAYYADSVKGRFTISQDKAKNTVYLQMNSLKPEDTAIYYCAAGQGCLTTIQALGGAYGYNAWGQGTQVTVS
3K1K	MAQVQLVESGGALVQPGGSLRLSCAASGFPVNRYSMRWYRQAPGKEREWVAGMSSAGDRSSYEDSVKGRFTISRDDARNTVYLQMNSLKPEDTAVYYCNVNVGFEYWGQGTQVTVS
3K74	MAQVQLQESGGGLVQPGGSLRLSCAASGFTFNNYWMYWVRRAPGKGLEWVSMINPGGIITKYAESVKGRFTISRDNAKNTLYLQMNSLTSEDTAVYYCAKDWATGLAKKGQGTQVTVS
3K7U	MAQVQLQESGGGLVQAGGSLTLSCAASGRTFSNNAMGWFRQAPGKEREFVAAISWTGGLLFYADSVNGRFTISRDNAKRTVTLQMNSLKPEDTAVYYCAARPQGDYVTAHYDYWGQGTQVTVS
3P0G	MAQVQLQESGGGLVQAGGSLRLSCAASGSIFSINTMGWYRQAPGKQRELVAAIHSGGSTNYANSVKGRFTISRDNAANTVYLQMNSLKPEDTAVYYCNVKDYGAVLYEYDYWGQGTQVTVS
3RJQ	MAQVQLQESGGGLVQAGGSLRLSCTASGRISSSYDMGWFRQAPGKEREFVAAISWSGGTTDYADSVKGRFAISKDNAKNAVYLQMNSLKPEDTAVYYCAAKWRPLRYSDYPSNSDYYDWGQGTQVTVS
3V0A	MAQVQLVESGGGLVQPGGSLRLSCAASGFTLGSRYMSWVRQAPGEGFEWVSSIEPSGTAWDGDSAKGRFTTSRDDAKNTLYLQMSNLQPEDTGVYYCATGYRTDTRIPGGSWGQGTQVTVS
3ZKQ	MAQVQLQESGGGLVQPGGSLRLSCAASGFTFSSAIMTWVRQAPGKGREWVSTIGSDGSITTYADSVKGRFTISRDNARNTLYLQMNSLKPEDTAVYYCTSAGRRGPGTQVTVS
4AQ1	MAQVQLQESGGGLVQAGGSLRLSCAASGRTSSAYAMGWFRQAPGKEREFVAGISSKGGSTYYGASMKGRFTISRDNAKNTVYLQMNGLAPEDTAVYYCAASDKYNFDTSHAGYGYWGQGTQVTVS
4C57	MAQVQLQESGGGLVQPGGSLRLSCSASGFKFNDSYMSWVRRVPGKGLEWVAGIWEDSSAAHYRDSVKGRFTISRDNAKNMLYLQMSSLKSDDTGLYYCVRRGYSGDYRPINNPSSQGTQVTVS
4C58	MAQVQLQESGGGSVQAGGSLRLSCGASEYTSRMGWFRQAPGAEREGVACIHRQSNLSYYSDSVRGRFTISQDNAKTTAFLLMSSLKPEDTAIYYCATTTDCAAFVERATAITAGQGTQVTVS
4CDG	MAQVQLQESGGGLVQAGGSLRLSCAASGIWFSINNMAWYRQTPGKQRERIAIITSAGTTNYVDSVKGRFTISRDDAKNTMYLQMNSLIPEDTAVYYCNLVADYDMGFQSFWGRGTQVTVS
4DK3	MAQVQLQESGGGLVQAGGSLRLSCAASGRTSSLYSMGWFRQAPGKEREFVAAISRNGANTYYTDSVKGRFTISRDNAKNTVELQMNSLKPEDTAVYYCAADRFPTMEVVTIMTNEYDYWGQGTQVTVS
4EIG	MAQVQLQESGGGLVQAGGSLRLSCKASGIIFSVYKMTWYRQAPGKERELVALITTNNNTMTVDSVKGRFTISRDNVQNTVYLEMNNLKPEDTAVYYCNANRGLAGPAYWGQGTQVTVS
4EIZ	MAQVQLQESGGGLVQAGGSLRLSCTASGRTFSSYAMGWFRQTPGKEREFVAAITWGGSTTLYADSVKGRFTMSRDNAKNTVYLQMNSLKPEDTAVYYCAADGSQYRSTYSFRDKPDYGSWGQGTQVTVS
4FHB	MAQVQLQESGGGLVQAGGSLRLSCEASGRTFSSYAMGWFRQAPERDFVAVISWSGSNTYYADSAKGRFTISRDNAKNTVYLQMNSLKPEDTAIYYCAAPGRPHGSSWSLNKKGQGYDYWGQGTQVTVS
4GFT	MAEVQLQESGGGTVQPGGSLKLSCSAAPERAFSNYAMGWFRQAPGQEREFVAGITGSGRSQYYADSVKGRFTISRDNAMNAVYLQMNSVKAEDTAVYYCAARVVPVFSDSTKGYVYWGQGTQVTVS
4GRWE	MAEVQLVESGGGLVQPGGSLRLSCAASGFTLDDYAIAWFRQAPGKEREGVSGIDSGDGSAYYADSVKGRFTISSDNAKNTVYLQMNSLRPEDTAVYYCARVRTGWGLNAPDYAMDYWGKGTLVTVS
4GRWF	MAEVQLVESGGGLVQPGGSLRLSCAASGFTLDYLAIGWFRQAPGKEREGVSCVSSSGQYTYYADSVKGRFTISRDNAESTVYLQMNSLKPEDTAVYYCATDPECYRVRGYYNGEYDYWGQGTQVTVS
4GRWH	MAEVQLVESGGGLVQAGGSLRLSCAASGRTFSWSAVGWFRQAPGKEREFVAAIRWSGGSPYYADSVKDRFTISRDNAKNTVYLQMNSLRPEDTAVYLCGETSLFPTSRGSHYDTWGQGTQVTVS
4HEM	MAQVQLVESGGGLVQAGGSLRLSCAASESTFSNYAMGWFRQAPGPEREFVATISQTGSHTYYRNSVKGRFTISRDNAKNTVYLQMNNMKPEDTAVYYCAAGDNYYYTRTYEYDYWGQGTQVTVS
4HEP	MADVQLVESGGGLVQPGGSLRLSCEASGFSFDDYAIGWFRQAPGKEREGVSYISMSDGRTYVADSVTGRFTISSDNAKNTVYLQMNSLKLEDTAVYYCAAGRFVTFGSAWSFVGGGPYGIDYWGKGTLVTVS
4I0C	MAQVQLQESGGGSVQAGGSLRLSCEASGLSTTVMAWFRQAPGKEREGVAAIYTGDGFPYYADSVKGRFTISQDNAKNRMYLQMNSLEPEDTAMYYCAAKTGAFSYGSLWWMSRAYNHWGQGTQVTVS
4I13	MAQVQLQESGGGLVQAGASLRLSCAASERLTVDYAIGWFRQAPGKEREFVAAISWGGGLTVYGESVEGRFTISRDIAKNTMNLQMNVLRPEDTANYYCAASRISYRVWNTIPYNKLTLWGRGTQVTVS
4IOS	MAQVQLVESGGGLVQAGDSLRLSCAVSSNVIGWFRQAPGKEREFVAAISWSTGSTYYGRSMKGRCAASRDNTVALQLNSLKPEDTAVYYCAATLDWGKTLSDEYDYWGQGTQVTVS
4KML	MAQVQLQESGGGLVQPGGSLRLSCAASGRTFSSYNMGWFRQAPGKGREFVASITSSGDKSDYTDSVKGRFTISRDNAKNTMYLQMNNLKPEDTATYYCARGLGIYIIRARGGYDHWGQGTQVTVS
4KRM	MAQVKLEESGGGSVQTGGSLRLTCAASGRTSRSYGMGWFRQAPGKEREFVSGISWRGDSTGYADSVKGRFTISRDNAKNTVDLQMNSLKPEDTAIYYCAAAAGSAWYGTLYEYDYWGQGTQVTVS
4KRO	MAQVQLQESGGGLVQPGGSLRLSCAASGRTFSSYAMGWFRQAPGKQREFVAAIRWSGGYTYYTDSVKGRFTISRDNAKTTVYLQMNSLKPEDTAVYYCAATYLSSDYSRYALPQRPLDYDYWGQGTQVTVS
4LAJ	MAEVQLVESGGGLVQPGGSLRLSCAASGFTLDYYSIGWFRQAPGKEREGVSCISDSDGRTYYADSVKGRFTISRDNAKNTVYLQMNSLKPEDTAVYYCATDCTVDPSLLYVMYYGKGTQVTVS
4LGP	MAQVQLVETGGGLVQPGGSLTLSCAGSGGTLEHYAIGWFRQAPGKEHEWLVCNRGEYGSTVYVDSVKGRFTASRDNAKNTVYLQLNSLKPDDTGIYYCVSGCYSWRGPWGQGTQVTVS
4LGR	MAQVQLVESGGGLVQPGGSLRLHCAASGSIASIYRTCWYRQGTGKQRELVAAITSGGNTYYADSVKGRFTISRDNAKNTIDLQMNSLKPEDTAVYYCNADEAGIGGFNDYWGQGTQVTVS
4LGS	MAQVQLVESGGGLVQAGGSLSLSCAASGGDFSRNAMAWFRQAPGKEREFVASINWTGSGTYYLDSVKGRFTISRDNAKNALYLQMNNLKPEDTAVYYCARSTVFAEITGLAGYQSGSYDYWGQGTQVTVS
4LHJ	MAQVQLVESGGGLVQAGGSLRLSCAASGSIVNFETMGWYRQAPGKERELVATITNEGSSNYADSVKGRFTISGDNAKNTVSLQMNSLKPEDTAVYYCSATFGSRWPYAHSDHWGQGTQVTVS
4LHQ	MAQVQLVETGGGTVQTGGSLRLSCSASGGSFSRNAMGWFRQAPGKEREFVAAINWSASSTYYRDSVKGRFTVSRDNAKNTVYLHLNSLKLEDTAAYYCAGSSVYAEMPYADSVKATSYNYWGQGTQVTVS
4M3K	MAQVQLQESGGGLVQPGGSLRLSCAASGSISSITTMGWYRQDGRELVALINSVGDTTYAGSVKGRFTISRDNAKNTVYLEMSSLKPEDTAVYYCNAFMSTNSGRTGSFWGQGTQVTVS
4MQS	MAQVQLQESGGGLVQAGDSLRLSCAASGFDFDNFDDYAIGWFRQAPGQEREGVSCIDPSDGSTIYADSAKGRFTISSDNAENTVYLQMNSLKPEDTAVYVCSAWTLFHSDEYWGQGTQVTVS
4N1H	MAQVQLQESGGGLVQAGASLKLSCAASGRTFSSYAMGWFRQAPGKEREFVAAISRSGGDTKYADSVKGRFAISRDNDKNTVWLRMNSLKPEDTAVYYCAATTYASLSDTYIGEHIYDDWGQGTQVTVS
4NBX	MAQVQLVESGGGLAQAGGSLRLSCAASGRTFSMDPMAWFRQPPGKEREFVAAGSSTGRTTYYADSVKGRFTISRDNAKNTVYLQMNSLKPEDTAVYYCAAAPYGANWYRDEYAYWGQGTQVTVS
4NBZ	MAQVKLEESGGGLVQAGGSLRLSCAASERTFSRYPVAWFRQAPGAEREFVAVISSTGTSTYYADSVKGRFTISRDNAKVTVYLQMNNLKREDTAVYFCAVNSQRTRLQDPNEYDYWGQGTQVTVS
4NC2	MAQVQLVESGGGLVQAGGSLRLSCAASGLTFSRYVMGWFRQAPGKEREFVAAITWGGTPNYADSVKGRFTISRDNSKNTQYLQMNSLKPEDTAVYYCAAGLGWDSRYSQSYNYWGQGTQVTVS
4OCL	MAQVQLQESGGGLVPAGGSLRLSCVDSGRTFSSTVMAWFRQAPGKEREFVATIRWSGGNTYYADSVKGRFTISRDNARNTVYLQMNSLKPEDTAVYYCAGGTYYGTLSYKYDFWGRGTQVTVS
4ORZ	MAQVQLVESGGGLVQAGGSLRLFCAASGFTFGTSNMAWLRQAPGKRREWVALITISGYTDYADSVKDRFTISRDNAKNTVSLQMNSLKPEDTAIYFCARRVGSEYDLWGQGTQVTVS
4P2C	MAQVQLQESGGGLVQAGGSLRLSCAVSGSIFRLSTMGWYRQAPGKQREFVASITSYGDTNYRDSVKGRFTISRDNAKNTVYLQMNSLKPEDTAVYYCNANIEAGTYYGPGRDYWGQGTQVTVS
4QGY	MAQVQLVESGGGLVQAGGSLRLSCAASGFTFEDYAIGWFRQAPGKEREGVSCISNLDGSTYYPDSVKGRFTASSDKAKNMVYLQMNSLKPEDTAVYYCAAVNAQGIYCTDYIIGPYGMDYWGKGTQVTVS
4QKX	MAQVQLQESGGGLVQAGGSLRLSCAASGSIFALNIMGWYRQAPGKQRELVAAIHSGGTTNYANSVKGRFTISRDNAANTVYLQMNSLKPEDTAVYYCNVKDFGAIIYDYDYWGQGTQVTVS
4QO1	MAQVQLQESGGGLVQAGGSLRLSCAASERTFSTYAMGWFRQAPGREREFLAQINWSGTTTYYAESVKDRTTISRDNAKNTVYLEMNNLNADDTGIYFCAAHPQRGWGSTLGWTYWGQGTQVTVS
4S10	MAQVQLQESGGGLVQAGGSLRLSCAASGRTFSSFVMGWFRQAPGKEREFVASISRSGSVTRYADSAKGRFTISKDNAKNTVSLQMDNLNPDDTAVYYCAADLHRPYGPGSQRTDDYDTWGQGTQVTVS
4TVS	MAQVQLVESGGGLVQAGGSLRLSCAASGRTLSSYAVGWFRQAPGLEREFVATISRSGGSTHYADSVKGRFTISRDNAKNTVYLQMNSLKPEDTAVYYCAATFTPDGSWYYTRGSSYDYWGQGTQVTVS
4W6W	MAQVQLQESGGGSVQAGGSLRLSCAASGYTSGRDSMGWFRQAPGKEREGVACIDTSGIVNYADSVKGRFTISQDSAKKTLYLEMNSLKPEDTALYSCATGPFVYGRGCLGQAFYSYWGQGTQVTVS
4W6X	MAQVQLQESGGGSVQAGGSLRLSCTASGYTYRKYCMGWFRQAPGKEREGVACINSGGGTSYYADSVKGRFTISQDNAKDTVFLRMNSLKPEDTAIYYCALSSNSVCPPGHVAWYNDWGQGTQVTVS
4W6Y	MAQVQLQESGGGSVQAGGSLRLSCAASGYTYSSNCMAWFRQVPGKEREGVASINTRGGITYYADSVKGRFTISRDNAKNTVSLQMNSLKPEDTATYYCAAVREATYSDNRCSVRSYTYDYWGQGTQVTVS
4WEM	MAQVQLQESGGGLVQAGGSLRLSCEASGNVDRIDAMGWFRQAPGKQREFVGYISEGGILNYGDFVKGRFTISRDNAKNTVYLQMSNLKSEDTGVYFCAASHWGTLLIKGIEHWGKGTQVTVS
4WEN	MAQVQLQESGGGLVQPGGSLRLSCTASGSISSINAMGWYRQAPGSKREFVAHITNTGVTEFADSVKGRFTISRDNAKTTVDLQMNSLKPEDTAVYYCAATDWGTLLIKGIDHWGKGTQVTVS
4WEU	MAQVQLQESGGGLVQAGGSLRLSCAASGLTFDTYAMGWFRQAPGKKREYVAAISWTGISTYYADIAKGRFTISRDNAKNTLYLQMDSLKPEDTAVYYCAAQKSLNVPAPWDYWGQGTQVTVS
4WGV	MAQVQLQESGGGLVQAGGSLRLSCAASRSIFSIDTANWYRQPPGMQRELVATITRDGNANYADSVKGRFTISRDRARNTVYLQMNSLKPEDTGVYYCNAAIRTTVRTSAQEYWGQGTQVTVS
4X7C	MADVQLVESGGGLVQPGGSLRLSCAASGSIFSIYAMGWYRQAPGKQRELVASISSGGGTNYADSVKGRFTISGDNAKNTVYLQMNSLKPEDTAVYYCKREDYSAYAPPSGRGRGTQVTVS
4X7F	MADVQLVESGGGLVQPGGSLRLSCAASESILSFNHMAWYRQGPGEQRELVAVITREGSTDYADSVKGRFTISRDNAKNMVYLLMSNLRPEDTAVYYCNRGISNPWGQGTQVTVS
5IV0	MAQVQLVESGGGLVQPGGSLTLSCTASGFTLDHYDIGWFRQAPGKEREGVSCINNSDDDTYYADSVKGRFTIFMNNAKDTVYLQMNSLKPEDTAIYYCAEARGCKRGRYEYDFWGQGTQVTVS

## Sheet: Interface Data (PDBE PISA)
	***Values denote Buried Surface Area in square angstroms, calculated from crystal structure interfaces and availible via PDBE PISA (https://www.ebi.ac.uk/pdbe/pisa/pistart.html)
IMGT #			1	2	3	4	5	6	7	8	9	11	12	13	14	15	16	17	18	19	20	21	22	23	24	25	26		39	40	41	42	43	44	45	46	47	48	49	50	51	52	53	54	55		66	67	68
AA Consensus	M	A	Q	V	Q	L	Q	E	S	G	G	G	L	V	Q	A	G	G	S	L	R	L	S	C	A	A	S	CDR1	M	G	W	F	R	Q	A	P	G	K	E	R	E	F	V	A	A	CDR2	T	Y	Y
3ZKQ	0	0	0	6.19	0	0	0	0	0	0	0	0	0	0	0	0	0	0	0	0	0	0	0	0	0	0	0	180.54	0	19.52	0	10.72	0	0	0	0	0	0	0	109.57	8.66	67.32	0	0	31.72	184.96	0.17	31.62	0
2XT1	0	0	0	0	0	0	0	0	0	0	0	0	0	0	0	0	0	0	0	0	0	0	0	0	0	0	0	78.35	1.17	10.01	0	37.63	0	0	0	0	0	0	18.32	83.12	25.46	93.66	1.1	0.5	14.9	73.48	5.43	90.42	12.44
4X7F	0	0	67.28	11.55	0	0	0	0	0	0	0	0	0	0	0	0	0	0	0	0	0	0	0	0	0	0	0	223.27	0	3.65	0	18.55	0	0	0	0	0	0	0	20.26	2.81	71.84	0.4	0.33	23.62	72.16	0	43.23	9.88
3K1K	0	0	0	0	0	0	0	0	0	0	0	0	0	0	0	0	0	0	0	0	0	0	0	0	0	0	0	26.28	0	88.49	0	42.72	0	0	0	0	0	0	32.71	3.8	0	44.32	0	0	4.95	85.31	0.82	39.37	0
3K74	0	0	0	0	0	0	0	0	0	0	0	0	0	0	0	0	0	0	0	0	0	0	0	0	0	0	0	82.85	0	25.63	0	0	0	0	0	0	0	0	3.16	13.92	0	59.35	0	0	38.37	95.81	1.58	91.66	3.69
4ORZ	0	0	0	0	0	0	0	0	0	0	0	0	0	0	0	0	0	0	0	0	0	0	0	0	0	0	0	34.64	0	0	0	0	0	0	0	0	0	0	54.46	20.68	17.12	44.23	0	0	28.86	148.7	42.14	67.37	10.36
4EIG	0	0	0	0	0	0	0	0	0	0	0	0	0	0	0	0	0	0	0	0	0	0	0	0	0	0	0	89.04	0	13.22	0	38.42	0	0	0	0	0	0	19.08	21.91	23.88	55.27	0	0	37.82	108.26	4.4	49.98	0
3CFI	0	0	0	0	0	0	0	0	0	0	0	0	0	0	0	0	0	0	0	0	0	0	0	0	0	0	0	120.74	0	0	0	0	0	0	0	0	0	0	0	11.33	24.28	7.89	0	0	0	64.85	0	0.49	0
4MQS	0	0	0	0	0	0	0	0	0	0	0	0	0	0	0	0	0	0	0	0	0	0	0	0	0	0	0	33.75	0	0	0.12	36.36	0	0	0	0	0	0	12.65	24.84	3.29	24.58	0.65	6.51	31.05	69.89	0	15.29	4.05
4LGP	0	0	0	35	13.79	0	0	0	0	0	0	0	0	0	0	0	0	0	0	0	0	0	0	0	0	0	0	207.62	0	0	0	0	0	0	0	0	0	0	0	0	0	18.92	0	0	3.8	156.43	0	5.02	0
4CDG	0	0	0	0	0	0	0	0	0	0	0	0	0	0	0	0	0	0	0	0	62.71	0	0	0	0	0	0	85.41	0	0	0	1.21	0	0	0	0	0	0	0	0	0	66.46	0	0	37.5	201.57	0	20.17	0
4LGR	0	0	0	0	0	0	0	0	0	0	0	0	0	0	0	0	0	0	0	0	0	0	0	0	0	0	0	127.82	0	0	0	25.51	0	0	0	0	0	0	0	0	0	16.57	0	0	9.34	153.33	15.78	68.56	0
4QKX	0	0	0	0	0	0	0	0	0	0	0	0	0	0	0	0	0	0	0	0	0	0	0	0	0	0	0	318.06	0	0	0	0	0	0	0	0	0	0	0	0	0	1.51	0	0	5.49	133.26	10.48	39.06	0
4M3K	0	0	0	0	0	0	0	0	0	0	0	0	0	0	0	0	0	0	0	0	0	0	0	0	0	0	0	75.55	0	0	0	16.27	0	0	0	0	0	0	0	86.79	13.22	36.91	0	0	30.13	65.76	8.42	49.74	0.37
2P42	0	0	0	0	0	0	0	0	0	0	0	0	0	0	0	0	0	0	0	0	0	0	0	0	0	0	0	238.25	0	0	0	0	0	0	0	0	0	0	0	0	0	0	0	0	0	0.33	0	0	0
3P0G	0	0	0	0	0	0	0	0	0	0	0	0	0	0	0	0	0	0	0	0	0	0	0	0	0	0	0	266.79	0	0	0	0	0	0	0	0	0	0	0	0	0	0	0	0	11.14	74.8	12.13	28.58	0
1ZV5	0	0	0	0.17	0	0	0	0	0	0	0	0	0	0	0	0	0	0	0	0	0	0	0	0	0	0	0	72.75	0	0	0	34.53	0	0	0	0	0	0	17.6	31.42	0.33	9.35	0	0	2.03	0	0	0	19.84
3V0A	0	0	0	0	0	0	0	0	0	0	0	0	0	0	0	0	0	0	0	0	0	0	0	0	0	0	0	177.57	0	0	0	0	0	0	0	0	0	0	0	0	0	5.32	0	0	0	122.06	0	74.52	0.43
4WEU	0	0	0	0	0	0	0	0	0	0	0	0	0	0	0	0	0	0	0	0	0	0	0	0	0	0	0	1.34	0	0	0	0	0	0	0	0	0	0	2.06	0	0	11.06	0	0	0	141.06	0	83.02	0
4X7C	0	0	0	0	0	0	0	0	0	0	0	0	0	0	0	0	0	0	0	0	0	0	0	0	0	0	0	106.71	1.59	4.01	0.29	18	0	0	0	0	0	0	0	7.94	0	4.65	0	0	23.95	151.51	13.35	40.89	0.12
4C57	0	0	0	0	0	0	0	0	0	0	0	0	0	0	0	0	0	0	0	0	0	0	0	0	0	0	0	34.11	0	0	0	0	0	0	0	0	0	0	0	0	0	0.3	0	0	0	112.9	0	61.2	0
1KXV	0	0	0	0	0	0	0	0	0	0	0	0	0	0	0	0	0	0	0	0	0	0	0	0	0	0	0	14.14	0	16.82	0	39.26	0	0	0	0	0	0	0	0	39.88	50.89	0	0	0.17	102.09	10.36	72.15	9.79
4OCL	0	0	0	0	0	0	0	0	0	0	0	0	0	0	0	0	0	0	0	0	0	0	0	0	0	0	0	29.39	0	0	0	0	0	0	0	0	0	0	0	2.18	0	0	0	0	0.33	83.68	8	47.97	0
4WEM	0	0	0	0	0	0	0	0	0	0	0	0	0	0	0	0	0	0	0	0	0	0	0	0	0	0	0	9.2	0	0	0	0	0	0	0	0	0	0	0	0	0	0.47	0	0	13.25	114.41	0	39.31	9.63
4WEN	0	0	0	0	0	0	0	0	0	0	0	0	0	0	0	0	0	0	0	0	0	0	0	0	0	0	0	4.95	0	0	0	6.89	0	0	0	0	0	0	0	0	0	0	0	0	0	45.71	0	43.55	0
4WGV	0	0	0	0	0	0	0	0	0	0	0	0	0	0	0	0	0	0	0	0	0	0	0	0	0	0	0	149.67	0	0	0	0	0	0	0	0	0	0	0	0	0	0	0	0	0	118.8	0	0	0
4LHJ	0	0	0	0	0	0	0	0	0	0	0	0	0	0	0	0	0	0	0	0	0	0	0	0	0	0	0	146.51	0	0	0	0	0	0	0	0	0	0	0	0	0	0	0	0	0	101.73	0	0	0
5IVO	0	0	0	0	0	0	0	0	0	0	0	0	0	0	0	0	0	0	0	0	0	0	0	0	0	0	0	0	0	1.68	0.49	15.13	0	15.11	0	0	0	0	17.5	66.5	19.63	39.51	1.1	4.35	13.62	0	4.41	30.34	29.89
3K7U	0	0	0	0	0	0	0	0	0	0	0	0	0	0	0	0	0	0	0	0	0	0	0	0	0	0	0	0	0	0	0	0	0	0	0	0	0	0	0	0	0	9.56	0	0	0	289.94	60.93	58.66	289.94
4HEM	0	0	0	0	0	0	0	0	0	0	0	0	0	0	0	0	0	0	0	0	0	0	0	0	0	0	0	0	0	0	0	0	0	0	0	0	0	0	0	0	0	21.6	0	0	0	36.35	0	87.34	0
1KXQ	0	0	46.06	22.08	0	0	0	0	0	0	0	0	0	0	0	0	0	0	0	0	0	0	0	0	0	0	0	149.34	0	0	0	0	0	0	0	0	0	0	0	0	0	0	0	0	0	377.27	9.08	31.82	0.29
4P2C	0	0	0	0	0	0	0	0	0	0	0	0	0	0	0	0	0	0	0	0	0	0	0	0	0	0	0	192.46	0	0	0	0	0	0	0	0	0	0	0	0	0	0	0	0	0	190.55	0	0	0
4IOS	0	0	0	0	0	0	0	0	0	0	0	0	0	0	0	0	0	0	0	0	0	0	0	0	0	0	0	0	0	0	0	0	0	0	0	0	0	0	0	0	0	11.79	0	0	0	0	0	91.44	6.26
4QO1	0	0	0	0	0	0	0	0	0	0	0	0	0	0	0	0	0	0	0	0	0	0	0	0	0	0	0	108.23	0	0	0	0	0	0	0	0	0	0	0	0	0	0	0	0	2.47	192.43	0	0	0
4NBX	0	0	23.83	12.31	0	0	0	0	0	0	0	0	0	0	0	0	0	0	0	0	0	0	0	0	0	0	0	274.24	0	0	0	0	0	0	0	0	0	0	0	0	0	0	0	0	0	23.03	0	33.11	0
4NC2	0	0	0	0	0	0	0	0	0	0	0	0	0	0	0	0	0	0	0	0	0	0	0	0	0	0	0	139.04	0	0	0	0	0	0	0	0	0	0	0	0	0	0	0	0	0	190.94	0	0	0
4GRWh	0	0	0	0	0	0	0	0	0	0	0	0	0	0	0	0	0	0	0	0	0	0	0	0	0	0	0	171.66	0	0	0	0	0	0	0	0	0	0	0	0	0	0	0	0	0	81.66	15.7	47.88	0
4laj	0	0	14.14	56.41	0	0	0	0	0	0	0	0	0	0	0	0	0	0	0	0	0	0	0	0	0	0	0	196.94	0	0	0	0	0	0	0	0	0	0	0	0	0	0	0	0	0	115.02	0	48.62	0
2BSE	0	0	0	0	0	0	0	0	0	0	0	0	0	0	0	0	0	0	0	0	0	0	0	0	0	0	0	126.66	0	0	0	0	0	0	0	0	0	0	0	0	0	4.83	0	0	0	111.27	2.2	53.36	0
4GFT	0	0	50.9	0	0	0	0	0	0	0	0	0	0	0	0	0	0	0	0	0	0	0	0	0	0	0	0	84.66	0	0	0	0	0	0	0	0	0	0	0	0	0	0	0	0	0	0	0	0	0
3EBA	0	0	0	0	0	0	0	0	0	0	0	0	0	0	0	0	0	0	0	0	0	0	0	0	0	0	0	136.65	0	0	0	0	0	0	0	0	0	0	0	0	0	0	0	0	0	82.38	0	0.43	0
4C58	0	0	0	0	0	0	0	0	0	0	0	0	0	0	0	0	0	0	0	0	0	0	0	0	0	0	0	88.48	0	0	0	0	0	0	0	0	0	0	0	0	0	0	0	0	0	204.41	12.96	73.82	3.16
4KRM	0	0	45.97	2.45	14.57	0	0	0	0	0	0	0	0	0	0	0	0	0	0	0	0	0	0	0	0	0	0	148.28	0	0	0	0	0	14.71	0	0	0	0	0	2.77	0	0	0	0	0	15.46	0	0	0
4AQ1	0	0	0	0	0	0	0	0	0	0	0	0	0	0	0	0	0	0	0	0	0	0	0	0	0	0	0	9.38	0	0	0	0	0	0	0	0	0	0	0	0	0	0	0	0	0	168.12	39.41	13.89	38.17
4KML	0	0	0	0	0	0	0	0	0	0	0	0	0	0	0	0	0	0	0	0	0	0	0	0	0	0	0	0	0	0	0	0	0	0	0	0	0	5.11	1.79	0	37.69	7.43	0	0	0	1.5	0	11.54	0
4nbz	0	0	0	0	0	0	0	0	0	0	0	0	0	0	0	0	0	0	0	0	0	0	0	0	0	0	0	6.36	0	0	0	0	0	0	0	0	0	0	0	0	0	0.31	0	0	7.32	121.16	20.49	60.87	0
1op9	0	0	3.66	0	0	0	0	0	0	0	0	0	0	0	0	0	0	0	0	0	0	0	0	0	0	0	0	122.64	0	0	0	0	0	0	0	0	0	0	0	0	0	0	0	0	0	84.14	0	8.7	0
2X6M	0	0	0	0	0	0	0	0	0	0	0	0	0	0	0	0	0	0	0	0	0	0	0	0	0	0	0	0	0	0	0	0	0	0	0	0	0	0	0	0	0	0	0	0	9.33	137.94	11.24	9.17	0
1ZVH	0	0	15.74	0	0	0	0	0	0	0	0	0	0	0	0	0	0	0	0	0	0	0	0	0	0	0	0	69.91	0	0	0	0	0	0	0	0	0	0	0	0	0	0	0	0	0	0	0	0	0
4GRWe	0	0	0	0	0	0	0	0	0	0	0	0	0	0	0	0	0	0	0	0	0	0	0	0	0	0	0	269.06	0	0	0	0	0	0	0	0	0	0	0	0	0	0	0	0	0	125.39	31.38	24.68	1.97
4W6X	0	0	0	0	0	0	0	0	0	0	0	0	0	0	0	0	0	0	0	0	0	0	0	0	0	0	0	38.03	0	0	0	0	0	0	0	0	0	0	0	2.19	0	0	0	0	0	0	0	0	0
4GRWf	0	0	0	31.64	0	0	0	0	0	0	0	0	0	0	0	0	0	0	0	0	0	0	0	0	0	0	0	230.91	0	0	0	0	0	0	0	0	0	0	0	0	0	0	0	0	0	236.27	30.1	65.89	22.45
4W6W	0	0	0	0	0	0	0	0	0	0	0	0	0	0	0	0	0	0	0	0	51.87	0	0	0	0	0	0	0	0	0	0	0	0	21.31	0	0	0	0	14.47	25.3	0	0	0	0	0	112.66	45.06	3.01	10.64
4I13	0	0	0	0	0	0	0	0	0	0	0	0	0	0	0	0	0	0	0	0	0	0	0	0	0	0	0	81.11	0	0	0	0	0	0	0	0	0	0	0	0	0	0	0	0	0	122.81	0	0	0
1ZVY	0	0	0	0	0	0	0	0	0	0	0	0	0	0	0	0	0	0	0	0	0	0	0	0	0	0	0	70.79	0	0	0	0	0	0	0	0	0	0	0	0	0	0	0	0	0	135.99	0	6.36	0
4TVS	0	0	17.24	0	0	0	0	0	0	0	0	0	0	0	0	0	0	0	0	0	0	0	0	0	0	0	0	57.27	0	0	0	0	0	0	0	0	0	0	0	0	0	0	0	0	0	0	0	0	0
4DK3	0	0	0	0	0	0	0	0	0	0	0	0	0	0	0	0	0	0	0	0	0	0	0	0	0	0	0	0.8	0	0	0	0	0	0	0	0	0	0	0	0	0	0	0	0	0	50.3	6.26	31.31	0
3RJQ	0	0	80.56	1.17	0	0	0	0	0	0	0	0	0	0	0	0	0	0	0	0	0	0	0	0	0	0	0	113.38	0	0	0	0	0	0	0	0	0	0	0	0	0	0	0	0	0	0	0	0	0
4S10	0	0	15	13.8	0	0	0	0	0	0	0	0	0	0	0	0	0	0	0	0	0	0	0	0	0	0	0	178.06	0	0	0	0	0	0	0	0	0	0	0	0	0	0	0	0	0	44.89	0	0	0
4n1h	0	0	0	0	0	0	0	0	0	0	0	0	0	0	0	0	0	0	0	0	0	0	0	0	0	0	0	0	0	0	0	0	0	0	0	0	0	0	0	0	0	0	0	0	0	12.09	0	8.16	0
4EIZ	0	0	0	0	0	0	0	0	0	0	0	0	0	0	0	0	0	0	0	0	0	0	0	0	0	0	0	19.65	0	0	0	0	0	0	0	0	0	0	0	0	0	0	0	0	0	235.07	0	0	0
1G6V	0	0	0	0	0	0	0	0	0	0	0	0	0	0	0	0	0	0	0	0	0	0	0	0	0	0	0	51.25	0	0	0	0	0	0	0	0	0	0	0	0	0	0	0	0	0	9.04	0	0	0
1KXT	0	0	0	0	0	0	0	0	0	0	0	0	0	0	0	0	0	0	0	0	0	0	0	0	0	0	0	50.75	0	0	0	9.99	0	0	0	0	0	0	25.57	15.13	14.77	46.24	0	0	56.36	86.93	0	35	14.5
1RJC	0	0	0	0	0	0	0	0	0	0	0	0	0	0	0	0	0	0	0	0	0	0	0	0	0	0	0	0	0	0	0	0	0	0	0	0	0	0	0	17.33	0	0	0	0	1.51	38.35	9.75	33.3	15.85
4I0C	0	0	0	0	0	0	0	0	0	0	0	0	0	0	0	0	0	0	0	0	0	0	0	0	0	0	0	46.23	0	0	0	0	0	0	0	0	0	0	0	0	0	0	0	0	0	254.74	16.87	56.08	7.97
4LHQ	0	0	0	0	0	0	0	0	0	0	0	0	0	0	0	0	0	0	0	0	0	0	0	0	0	0	0	101.39	0	0	0	0	0	0	0	0	0	0	0	0	0	0	0	0	0	82.86	0	0	0
4FHB	0	0	0	0	0	0	0	0	0	0	0	0	0	0	0	0	0	0	0	0	0	0	0	0	0	0	0	5.53	0	0	0	0	0	0	0	0	0	0	0	0	0	0	0	0	0	196.24	1.31	0	0
4LGS	0	0	0	0	0	0	0	0	0	0	0	0	0	0	0	0	0	0	0	0	0	0	0	0	0	0	0	71.37	0	0	0	0	0	0	0	0	0	0	0	0	0	0	0	0	0	65.13	0	0	0
4W6Y	0	0	0	0	0	0	0	0	0	0	0	0	0	0	0	0	0	0	0	0	0	0	0	0	0	0	0	18.17	0	0	0	0	0	0	0	0	0	0	5.65	0	0	0	0	0	0	1.31	0	3.45	0
4KRO	0	0	57.32	9.74	0	0	0	0	0	0	0	0	0	0	0	0	0	0	0	0	0	0	0	0	0	0	0	92.28	0	0	0	0	0	0	0	0	0	0	0	0	0	0	0	0	0	0	0	0	0
4HEP	0	0	0	0	0	0	0	0	0	0	0	0	0	0	0	0	0	0	0	0	0	0	0	0	0	0	0	0	0	0	0	0	0	0	0	0	0	0	1.77	0	0	0	0	0	15	0	0	50.45	14.1
3G9A	0	0	0	0	0	0	0	0	0	0	0	0	0	0	0	0	0	0	0	0	0	0	0	0	0	0	0	0	0	0	0	0	0	0	0	0	0	0	22.54	0	0	0	0	0	0	0	0	0	0
1jtp	0	0	0	0	0	0	0	0	0	0	0	0	0	0	0	0	0	0	0	0	0	0	0	0	0	0	0	113.27	0	0	0	0	0	0	0	0	0	0	0	0	0	0	0	0	0	131.4	0	0	0
[truncated: 48 more columns]
